# Supplementary material for: SIRT-3 Modulation by Resveratrol Improves Mitochondrial Oxidative Phosphorylation in Diabetic Heart through Deacetylation of TFAM
Source: MDPI journal article supplement (doi:10.3390/cells7120235), 2018-11-28
Supplement: s1 [file s1]

**(A)**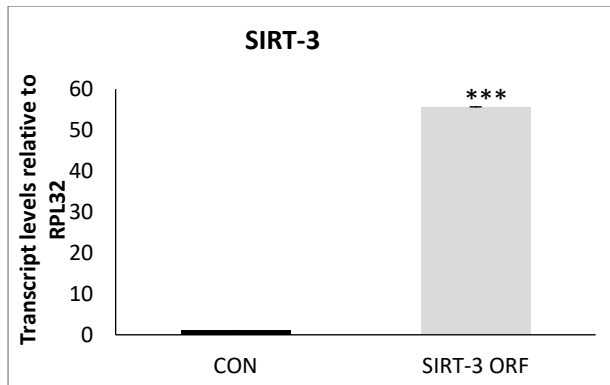**(B)**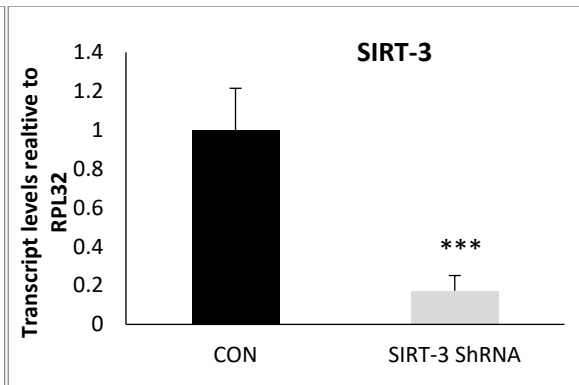**(C)**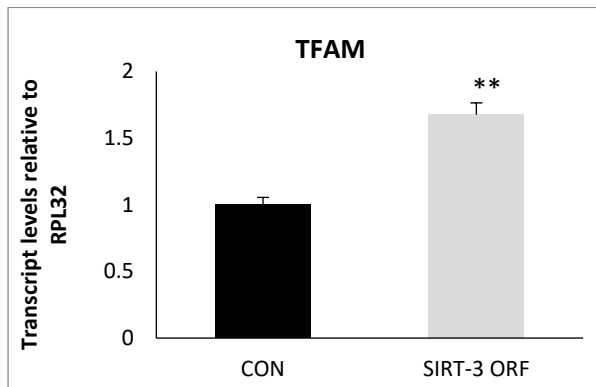**(D)**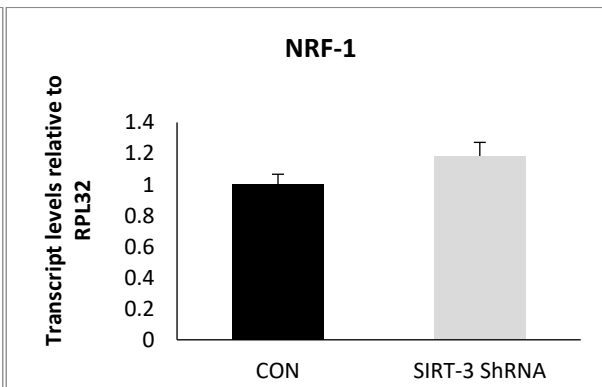**(E)**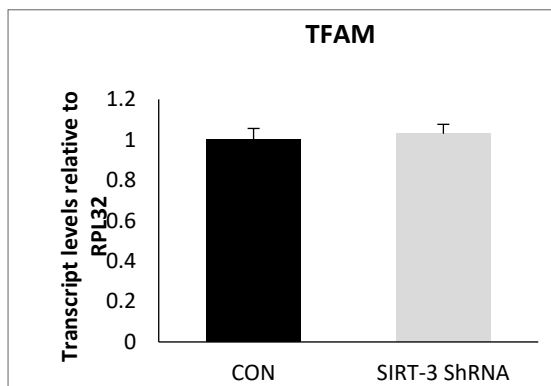

**Supplementary. Effect of SIRT-3 overexpression and stable knockdown in H9c2 cells.** A) mRNA expression of SIRT-3 after SIRT-3 overexpression in H9c2 cells. B) mRNA expression of SIRT-3 after SIRT-3 silencing using shRNA in H9c2 cells. C) mRNA expression of TFAM after SIRT-3 over expression in H9c2 cells. D) mRNA expression of NRF-1 after SIRT-3 silencing using shRNA in H9c2 cells. E) mRNA expression of TFAM after SIRT-3 silencing using shRNA in H9c2 cells.
